1 **Different adjuvanted pediatric HIV envelope vaccines**  
2 **induced distinct plasma antibody responses despite similar B**  
3 **cell receptor repertoires in infant rhesus macaques.**  
4  
5

6 Stella J. Berendam<sup>1,#</sup>, Papa K Morgan-Asiedu<sup>1,#</sup>, Riley J. Mangan<sup>1</sup>, Shukhang Li<sup>1</sup>, Holly  
7 Heimsath<sup>1</sup>, Kan Luo<sup>1</sup>, Alan D. Curtis II<sup>2</sup>, Joshua A. Eudailey<sup>1,8</sup>, Christopher B. Fox<sup>3,4</sup>, Mark A.  
8 Tomai<sup>5</sup>, Bonnie Phillips<sup>2</sup>, Hannah L. Itell<sup>1</sup>, Erika Kunz<sup>1</sup>, Michael Hudgens<sup>6</sup>, Kenneth Cronin<sup>1</sup>,  
9 Kevin Wiehe<sup>1</sup>, S.Munir Alam<sup>1</sup>, Koen K.A. Van Rompay<sup>7</sup>, Kristina De Paris<sup>2</sup>, Sallie R. Permar<sup>1,8</sup>,  
10 M. Anthony Moody<sup>1,\*</sup>, and Genevieve G. Fouda<sup>1,\*</sup>  
11  
12  
13

14 <sup>1</sup>Duke Human Vaccine Institute, Duke University Medical Center, Durham, North Carolina,  
15 USA  
16

17 <sup>2</sup>Department of Microbiology and Immunology, Children's Research Institute and Center for  
18 AIDS Research, School of Medicine, University of North Carolina at Chapel Hill, Chapel Hill,  
19 North Carolina, USA  
20

21 <sup>3</sup>Infectious Disease Research Institute (IDRI), Seattle, Washington State, USA  
22

23 <sup>4</sup>Department of Global Health, University of Washington, Seattle, Washington State, USA  
24

25 <sup>5</sup>3M Drug Delivery Systems, 3M center, St. Paul, Minnesota, USA  
26

27 <sup>6</sup>Department of Biostatistics, University of North Carolina at Chapel Hill, Chapel Hill, North  
28 Carolina, USA  
29

30 <sup>7</sup>California National Primate Research Center, University of California at Davis, Davis,  
31 California, USA  
32

33 <sup>8</sup>Department of Pediatrics, Weill Cornell College of Medicine, New York City, New York, USA  
34  
35

36 Corresponding author: Genevieve G. Fouda ([genevieve.fouda@duke.edu](mailto:genevieve.fouda@duke.edu))  
37  
38

39 #Shared first authorship. SJB performed data analysis, designed figures, and wrote the  
40 manuscript. PKMA performed experiments and contributed to the writing of the manuscript.  
41  
42

43 \*Shared last authorship. GGF and MAM contributed equally to design of the experiments and  
44 manuscript editing.

45

## 46 **Abstract**

47 Different HIV vaccine regimens elicit distinct plasma antibody responses in both human and  
48 nonhuman primate models. Previous studies in human and non-human primate infants showed  
49 that adjuvants influenced the quality of plasma antibody responses induced by pediatric HIV  
50 envelope vaccine regimens. We recently reported that use of the 3M052-SE adjuvant and longer  
51 intervals between vaccinations are associated with higher magnitude of antibody responses in  
52 infant rhesus macaques. However, the impact of different adjuvants in HIV vaccine regimens on  
53 the developing infant B cell receptor (BCR) repertoire has not been studied. This study evaluated  
54 whether pediatric HIV envelope vaccine regimens with different adjuvants induced distinct  
55 antigen-specific memory B cell repertoires and whether specific immunoglobulin (Ig)  
56 immunogenetic characteristics are associated with higher magnitude of plasma antibody  
57 responses in vaccinated infant rhesus macaques. We utilized archived preclinical pediatric HIV  
58 vaccine studies PBMCs and tissue samples from 19 infant rhesus macaques immunized either  
59 with (i) HIV Env protein with a squalene adjuvant, (ii) MVA-HIV and Env protein  
60 coadministered using a 3-week interval, (iii) MVA-HIV prime/ protein boost with an extended 6-  
61 week interval between immunizations, or (iv) with HIV Env administered with 3M-052-SE  
62 adjuvant. Frequencies of vaccine-elicited HIV Env-specific memory B cells from PBMCs and  
63 tissues were similar across vaccination groups (frequency range of 0.06-1.72%). There was no  
64 association between vaccine-elicited antigen-specific memory B cell frequencies and plasma  
65 antibody titer or avidity. Moreover, the epitope specificity and Ig immunogenetic features of  
66 vaccine-elicited monoclonal antibodies did not differ between the different vaccine regimens.  
67 These data suggest that pediatric HIV envelope vaccine candidates with different adjuvants that  
68 previously induced higher magnitude and quality of plasma antibody responses in infant rhesus  
69 macaques were not driven by distinct antigen-specific memory BCR repertoires.

70

## 71 **Introduction**

72 In 2019, 85% of the estimated 1.3 million pregnant women living with HIV-1 globally received  
73 antiretroviral drugs to prevent transmission to their children (1). While the implementation of  
74 antiretroviral prophylaxis has significantly decreased the global frequency of mother-to-child  
75 transmission (MTCT) of HIV-1, issues of maternal adherence to antiretroviral therapy (ART) (2,  
76 3), development of ART-resistant viruses (4), and insufficient coverage of ART in some of the  
77 hardest-hit areas globally have limited the effectiveness of ART (5). Furthermore, women with  
78 acute HIV-1 infection in late pregnancy or during the breastfeeding period are less likely to be  
79 diagnosed and receive treatment to prevent MTCT (6). Thus, despite advancements in therapy,  
80 breast milk transmission still accounts for approximately 50% of pediatric HIV infections (7, 8).  
81 Additional prevention strategies, such as a pediatric HIV-1 vaccine, are therefore critically  
82 needed to eradicate breast milk transmission of HIV-1.

83 Early efforts in HIV-1 vaccine development focused on the humoral arm of the immune  
84 system as other vaccines that successfully prevent viral diseases relied on antibodies for  
85 protection (9). However, early-phase HIV-1 vaccine studies using recombinant HIV-1 envelope  
86 (Env) proteins showed no efficacy (10-12) with the exception of the RV144 trial that  
87 demonstrated moderate vaccine efficacy of 61% during the first year and an overall efficacy of  
88 31% at 3.5 years after vaccination (13, 14). Interestingly, non-neutralizing IgG that targeted the

89 HIV-1 Env variable loops 1 and 2 (V1V2) were identified as correlates of protection from the  
90 RV144 study; meanwhile HIV-1 Env-specific IgA plasma antibodies were associated with lack  
91 of protection (15). This finding reinvigorated the optimism that an effective HIV-1 vaccine is  
92 attainable. A phase 2b/3 study (HVTN 702 or Uhambo) in South Africa, which used a pox vector  
93 prime-protein boost vaccine regimen similar to RV144, albeit with distinct vaccine strains and a  
94 different adjuvant, did not reproduce the results from the RV144 study and showed no efficacy  
95 (16). Nevertheless, these studies demonstrated that HIV-1 vaccine immunogens could induce  
96 robust levels of V1V2 IgG antibodies as well as polyfunctional CD4<sup>+</sup> T cell responses as  
97 surrogate of possible protection (15, 17).

98 To date, only a few previous pediatric HIV-1 vaccine trials have been conducted and  
99 these trials demonstrated that immunization with recombinant subunit HIV gp120 vaccines  
100 (PACTG 230) or with canarypox vectors expressing HIV antigens (PACTG 326, HPTN 027) are  
101 safe and immunogenic (18-21). Importantly, HIV-1 infant vaccination with MF-59 adjuvanted  
102 HIV gp120 was able to generate robust and durable Env-specific IgG responses including anti-  
103 V1V2 IgG responses with low levels of Env-specific IgA responses (22). Similarly, neonatal  
104 rhesus macaques are capable of developing robust virus-specific humoral and cellular immune  
105 responses after SIV vaccination (23, 24). These clinical and preclinical studies demonstrate the  
106 feasibility of initiating HIV-1 immunization within the first few days of life.

107 Our previous studies in human and non-human primate infants have indicated that several  
108 factors can modulate the quality of the vaccine-elicited antibody response in infants (25, 26).  
109 Notably, we observed that extending the interval between immunizations and the use of toll-like  
110 receptor (TLR) agonist adjuvants can enhance the magnitude and breadth of the cellular and  
111 humoral responses (26, 27). However, the influence of distinct HIV vaccine regimens and  
112 adjuvants on the developing infant B cell repertoire has not been studied and the relationship  
113 between the magnitude and quality of HIV-1 vaccine-elicited responses and immunogenetic  
114 characteristics of the infant B cell repertoire remains unclear. Taking advantage of archived  
115 plasma samples obtained from completed preclinical studies (25, 26), we assessed the antigen-  
116 specific B cell repertoire in HIV vaccinated infant rhesus macaques. Our results indicated that  
117 the magnitude and quality of plasma antibody responses induced by pediatric HIV vaccine  
118 regimens with different adjuvants were not associated with distinct B cell repertoire profiles in  
119 infant rhesus macaques.

120

## 121 **Methods**

### 122 **Animals**

123 A total of 19 Simian Immunodeficiency Virus (SIV)-negative and type D retrovirus-negative  
124 newborn Indian-origin rhesus macaques (*Macaca mulatta*) were hand reared in the nursery of the  
125 California National Primate Research Center (CNPRC, Davis, CA) as previously described (25).  
126 Animals were reared in accordance with the American Association for Accreditation of  
127 Laboratory Animal Care Standards, the guidelines of the Guide for the Care and Use of  
128 Laboratory Animals of the Institute for Laboratory Research, National Research Council, and the  
129 International Guiding Principles for Biomedical Research Involving Animals. All protocols were  
130 assessed and approved by the University of California at Davis Institutional Animal Care and  
131 Use Committee prior to beginning the study. Animals were randomly assigned to groups and  
132 anesthetized for vaccinations and sample collection as previously reported (25, 26).

133

## 134 **Immunization regimens and study designs**

135 Immunization regimens and study designs for all 4 animal groups are summarized in Figure 1  
136 and were previously described (25, 26). Briefly, infants in group 1 (protein only, n=5) were  
137 vaccinated at 0, 3 and 6 weeks of age intramuscularly (IM) with  $5 \times 10^8$  infectious units [IU] of  
138 MVA/SIV gag/pol, with 15  $\mu\text{g}$  of C.1086 gp120 administered IM in Span85-Tween 80-squalene  
139 (STS) adjuvant, and with 200  $\mu\text{g}$  of C.1086 gp120 administered intranasally (IN) in Toll-like  
140 receptor 7 and 8 (TLR7/8) agonist, R848 adjuvant (25). Infants in group 2 (co-administration,  
141 n=5) were vaccinated at 0, 3 and 6 weeks of age with similar regimen as group 1 with addition of  
142 the MVA-HIV Env ( $5 \times 10^8$  IU, IM). Infants from these two groups were followed for 19 and 15  
143 weeks, respectively, after which they were euthanized to analyze vaccine-induced tissue  
144 responses. Infants in group 3 (extended interval, n=4) received the same vaccine regimen as the  
145 co-administration group but were immunized at 0, 6 and 12 weeks and then boosted at 32 before  
146 euthanasia at week 35 (25). Infants in group 4 (3M-052-SE, n=4) were immunized at 0, 2 and 6  
147 weeks of age with a combination of HIV.C.1086C gp120 and TV1 gp120 (15 $\mu\text{g}$  each, IM) in  
148 TLR7/8-based adjuvant 3M-052 formulated in stable emulsion (3M-052-SE) (26).

149

## 150 **Collection and processing of blood and tissue specimens**

151 Whole blood, plasma, and peripheral blood mononuclear cells (PBMCs) were collected before  
152 each immunization and thereafter biweekly throughout the study as previously described (25,  
153 26). PBMCs reported in this study were collected at week 8 for the protein only,  
154 coadministration, and extended interval groups. Spleen, lymph nodes (LNs; axillary, mesenteric,  
155 submandibular, cervical, submental, and retropharyngeal), and intestinal tissues (colon and  
156 ileum) were collected for preparation of mononuclear cell (MNC) suspensions at necropsies for  
157 groups 1 to 3 (i.e., the protein only, coadministration, and extended interval groups). LN biopsies  
158 were collected at week 10 while PBMCs were collected at week 15 in the 3M-052-SE group.

159

## 160 **Single-cell flow cytometry sorting of antigen-specific memory B cells**

161 PBMCs and tissue MNC suspensions were treated with 5  $\mu\text{M}$  Chk2 inhibitor II or 2-[4-(4-  
162 chlorophenoxy)phenyl]-1H-benzimidazole-5-carboxamide (Sigma) prepared in final volume of  
163 1% bovine serum albumin (Sigma-Aldrich) in 1X phosphate buffered saline (PBS, Sigma).  
164 PBMCs and MNC suspensions were blocked with 6.25  $\mu\text{g}/\text{ml}$  anti-human CD4 antibody (BD  
165 Biosciences) at 4°C for 15 min followed by staining with a panel of fluorochrome-conjugated  
166 antibodies to identify antigen-specific memory B cells as described by gating strategy  
167 (Supplemental figure 2B). Briefly, lymphocytes were gated on singlets and live cells based on  
168 Aqua vital dye (Invitrogen), exclusion of T cells (CD3-PerCP-Cy5.5, clone SP34-2, BD  
169 Biosciences) and monocytes/macrophages (CD14-BV570, clone M5E2, BioLegend; CD16-  
170 Phycoerythrin-Cy7, clone 3G8, BD Biosciences), followed by selection of memory B cells by  
171 positive expression of CD20 and CD27 (CD20-FITC, clone 2H7; CD27-APC-Cy7, clone O323,  
172 both BioLegend) but not immunoglobulin D (IgD-PE, Southern Biotech) with double specificity  
173 to both HIV C.1086 Env hooks (BV421-gp120 C.1086 and AF647-gp120 C.1086, both  
174 generated in-house). Percent of antigen-specific memory B cells from individual infants and  
175 tissue types as well as representative flow cytometry analysis for sorting are listed in  
176 Supplemental Figure 2A.

177

## 178 **Polymerase chain reaction (PCR) amplification of immunoglobulin** 179 **(Ig) V<sub>H</sub> and V<sub>L</sub> genes**

180 The sorted single-cell antigen specific memory B cells V<sub>H</sub> and V<sub>L</sub> genes were amplified by  
181 nested PCR as previously described (28-30) followed by Sanger sequencing of the purified  
182 nested PCR products. Sequences were analyzed using a custom bioinformatics pipeline and were  
183 annotated with immunogenetic information using the Cloanalyst software package  
184 (<https://www.bu.edu/computationalimmunology/research/software/>) (31). Identification of Ig  
185 subtypes and functional Ig heavy and light chains were first performed using human Ig sequence  
186 database as previously described (28) and recombinant monoclonal antibodies (mAbs) were  
187 generated based on this analysis. Subsequently the immunogenetic characteristics of the  
188 recombinant mAbs were reanalyzed using a rhesus Ig sequence database once it became  
189 available.

190

## 191 **Results**

### 192 **Enhancement of pediatric HIV Env antibody responses by extended** 193 **vaccine interval and TLR agonist adjuvants despite similar antigen-** 194 **specific memory B cells in PBMC and tissues across vaccination** 195 **groups.**

196 We have evaluated different vaccine regimens and immunization schedules (Fig 1, see details in  
197 methods) to optimize HIV Env-specific antibody responses in infant rhesus macaques (25, 26).  
198 Previously, we observed that the magnitude and quality of vaccine-induced HIV Env-specific  
199 responses can be enhanced by increasing the timing of vaccination interval from 3 to 6 weeks  
200 (25) and by using the TLR7/8 agonist adjuvant 3M-052-SE when compared to alum or to the  
201 TLR4 ligand glucopyranosyl lipid formulated in SE (GLA-SE) (26). Overall, infants vaccinated  
202 with 3M-052-SE-adjuvanted vaccine developed the highest magnitude of HIV Env C.1086  
203 gp120-specific plasma IgG antibody concentrations across all four groups at peak  
204 immunogenicity (S1 Fig A). Additionally, at peak immunogenicity, infant plasma antibody from  
205 all four groups developed varying levels of cross clade Env gp120 responses as well as broad  
206 heterologous epitope specificities and breadth (S1 Fig B-C). Infant plasma IgG antibody from  
207 group 4 (3M-052-SE) also demonstrated higher avidity strengths against the tested antigens (HIV  
208 Env 1086d7gp120 K160N and gp70 ConC V3) compared to other immunization groups (S1 Fig  
209 D).

210 **Fig 1. Animal study design and immunization schedule.** Infant rhesus macaques from four  
211 immunization schedules were included. Protein only group was immunized with MVA-SIV  
212 gag/pol and HIV Envelope (Env) 1086c adjuvanted with 15 µg STS, intramuscular + 200 µg  
213 R848, intranasal. Coadministration group was immunized with MVA-SIV gag/pol, HIV Env  
214 1086c adjuvanted with 15 µg STS, intramuscular + 200 µg R848, intranasal), and with MVA-  
215 HIV Env. Extended interval group was immunized with similar immunogens as  
216 Coadministration group with longer immunization intervals. 3M-052-SE group was immunized  
217 with HIV Env 1086c/TV1 bivalent adjuvanted with 15 µg/15 µg+3M-052-SE, intramuscular.

218 Plus symbol (+) denoted necropsy, IM denoted intramuscular, IN denoted intranasal, and IU  
 219 denoted infectious unit.

220

221 **Single-cell flow cytometry sorting of antigen-specific memory B cells indicated**  
 222 **low level of frequencies across all vaccination groups.**

223 To determine whether the different vaccine regimens induced antibodies with distinct frequency  
 224 of antigen-specific memory B cells, we characterized antigen-specific memory B cells from  
 225 PBMC and tissues at selected time points (Fig 1). We were able to obtain Env-specific memory  
 226 B cells (CD3-CD16-CD14-CD20+CD27+IgD-, double positive for HIV Env C.1086 gp120)  
 227 from 3 of 5 infants in group 1 (protein only), 5 of 5 infants in group 2 (coadministration), 3 of 5  
 228 infants in group 3 (extended interval), and from 4 of 4 infants in group 4 (3M-052-SE) (S2 Fig  
 229 A-B). The frequency of Env-specific memory B cells were low across all vaccine groups (0.06-  
 230 1.72%) with 0.07-1.72% range in group 1, 0.06-0.97% in group 2, 0.08-0.49% in group 3, and  
 231 0.06-0.11% in group 4.

232 We were able to produce a total of 39 mAbs with functional heavy- and light-chain pairs  
 233 based on our initial analysis using the human Ig sequence database (28), because rhesus Ig  
 234 database was unavailable at the time. The 39 mAbs came from 13 specimens including 3  
 235 specimens from group 1 (2 infants), 3 specimens from group 2 (2 infants), 4 specimens from  
 236 group 3 (2 infants), and 3 specimens from group 4 (3 infants) for final B cell repertoire analyses  
 237 (Table 1). No tissue specimen was available for group 4 as these infants were part of a challenge  
 238 study. Overall, the frequencies of Env-specific memory B cells in PBMCs and tissues did not  
 239 differ between the vaccine groups. The percent frequency of antigen-specific memory B cells  
 240 ranged from 0.06 to 1.72%, with the highest frequency observed in the PBMCs of 2 infants in  
 241 group 1 (protein only) (S2 Fig A). Notably, despite higher magnitude and quality of Env-specific  
 242 plasma antibody responses in group 3 (extended interval) compared to group 2  
 243 (coadministration) (25), the frequencies of Env-specific memory B cells did not differ between  
 244 these groups. Similarly, despite higher binding magnitude and avidity strength of Env-specific  
 245 plasma antibody responses in group 4 (3M-052-SE) when compared to others, the frequencies of  
 246 Env-specific memory B cells at least in the PBMCs of vaccinated infants in this group did not  
 247 differ to the other groups. Altogether, these data suggest that the size of HIV Env vaccine-  
 248 elicited memory B cell pool is not directly related to magnitude or quality of plasma Env-specific  
 249 antibody responses in infant rhesus macaques.

250

251 **Table 1. Immunogenetic characteristics of isolated envelope (Env)-reactive mAbs of Env-**  
 252 **vaccinated infant monkeys based on human immunoglobulin database analysis.** A total of  
 253 39 pairs of potentially Env-reactive mAbs were isolated from the four vaccination groups across  
 254 several anatomic compartments. Frequency of gene usage, percent somatic hypermutation, and  
 255 complementarity-region 3 (CDR3) length are displayed for the heavy and light chains for each  
 256 mAb along with the isotype and epitope specificity.

257

| Animal ID | Group        | Tissue | IgH ID  | V <sub>H</sub> gene | D <sub>H</sub> gene | J <sub>H</sub> gene | HC % SHM | HC CDR3 length | Ig Isotype | IgL ID  | V <sub>L</sub> /V <sub>κ</sub> gene | J <sub>L</sub> /J <sub>κ</sub> gene | Specificity  |
|-----------|--------------|--------|---------|---------------------|---------------------|---------------------|----------|----------------|------------|---------|-------------------------------------|-------------------------------------|--------------|
| 45521     | Protein Only | Spleen | H020465 | 4~4*07              | 2~OF15*2/inv        | 3*01                | 5.31     | 23             | IgG        | K020382 | 1~33*01                             | 2*03                                | Undetermined |

|       |                   |                    |         |            |            |         |       |    |     |         |            |         |                  |
|-------|-------------------|--------------------|---------|------------|------------|---------|-------|----|-----|---------|------------|---------|------------------|
| 45521 | Protein Only      | Retropharyngeal LN | H914640 | 4~4*07     | 3~3*01     | 3*01    | 6.14  | 23 | IgA | K907482 | 1~33*01    | 2*03    | Undetermined     |
| 45521 | Protein Only      | Retropharyngeal LN | H914648 | 4~4*07     | 3~3*01     | 3*01    | 6.65  | 23 | IgG | K907485 | 1~33*01    | 2*03    | Undetermined     |
| 45521 | Protein Only      | Retropharyngeal LN | H914649 | 4~4*07     | 5~12*01    | 3*01    | 5.88  | 23 | IgG | K907486 | 1~33*01    | 2*03    | Undetermined     |
| 45522 | Protein Only      | Spleen             | H020414 | 4~61*03    | 6~13*01    | 4*02    | 10.03 | 13 | IgG | L020264 | 1~51*02    | 3*02    | Undetermined     |
| 45083 | Coadministration  | Spleen             | H020400 | 4~59*01    | 6~19*01    | 4*02    | 6.17  | 13 | IgM | L020253 | 1~40*01,02 | 2*01    | V1V2             |
| 45083 | Coadministration  | Mediastinal LN     | H020405 | 4~59*01,02 | 3~16*01,02 | 4*02    | 4.52  | 17 | IgG | K020331 | 1D~16*01   | 2*03,04 | V1V2             |
| 45083 | Coadministration  | Mediastinal LN     | H020405 | 4~59*01,02 | 3~16*01,02 | 4*02    | 4.52  | 17 | IgG | L020258 | 2~23*02    | 1*01    | V3               |
| 45083 | Coadministration  | Mediastinal LN     | H020407 | 4~b*02     | 5~12*01    | 4*02    | 8.41  | 13 | IgG | L020260 | 2~8*01     | 1*01    | V3               |
| 45083 | Coadministration  | Mediastinal LN     | H020408 | 4~39*06    | 1~26*01    | 4*02    | 6.38  | 13 | IgG | L020260 | 2~8*01     | 1*01    | Undetermined     |
| 45091 | Coadministration  | Axillary LN        | H020381 | 3~73*01,02 | 2~2*02/inv | 6*02    | 10.15 | 14 | IgG | L020241 | 11~55*01   | 2*01    | Undetermined     |
| 45091 | Coadministration  | Axillary LN        | H020387 | 4~59*01    | 4~4*01     | 4*02    | 4.74  | 17 | IgG | K020324 | 1~39*01    | 4*01    | V3               |
| 45435 | Extended Interval | Mediastinal LN     | H020422 | 4~59*01    | 3~3*01,02  | 3*01,02 | 6.19  | 18 | IgA | K020341 | 1~13*02    | 4*01    | V1V2             |
| 45435 | Extended Interval | Mediastinal LN     | H020425 | 4~59*01,02 | 3~OR15*3   | 5*01,02 | 7.63  | 16 | IgG | K020344 | 1~33*01    | 2*03    | CD4 binding site |
| 45435 | Extended Interval | Mediastinal LN     | H020426 | 3~72*01    | 1~OR15*1   | 6*02    | 8.30  | 14 | IgM | L020282 | 11~55*01   | 2*01    | V3               |
| 45435 | Extended Interval | Mediastinal LN     | H020430 | 3~11*01    | 1~7*01/inv | 5*01    | 10.61 | 17 | IgG | K020348 | 1/OR2~0*01 | 2*03    | V1V2             |
| 45435 | Extended Interval | Mediastinal LN     | H020431 | 3~64*02    | 4~17*01    | 5*01    | 9.40  | 12 | IgG | K020349 | 3~11*01    | 1*01    | V1V2             |
| 45435 | Extended Interval | Mediastinal LN     | H020445 | 4~4*02     | 4~4*01     | 4*02    | 6.53  | 16 | IgG | K020359 | 1D~16*01   | 2*03    | V3               |
| 45435 | Extended Interval | Mediastinal LN     | H020420 | 4~61*05    | 6~13*01    | 4*02    | 11.08 | 16 | IgG | L020280 | 5~39*01    | 2*01    | V3               |
| 45435 | Extended Interval | Spleen             | H020461 | 3~73*01,02 | 2~15*01    | 4*02    | 9.65  | 17 | IgG | K020380 | 1~12*01,02 | 2*03    | Undetermined     |
| 45441 | Extended Interval | Spleen             | H020449 | 3~21*01,02 | 1~IR1*01   | 1*01    | 6.05  | 29 | IgG | K020361 | 1D~16*01   | 1*01    | Undetermined     |
| 45441 | Extended Interval | Spleen             | H020452 | 4~59*01    | 3~3*01     | 4*02    | 7.18  | 18 | IgG | L020292 | 1~51*02    | 7*01    | CD4 binding site |
| 45441 | Extended Interval | Spleen             | H020450 | 3~21*01,02 | 3~22*01    | 1*01    | 7.14  | 15 | IgG | L020290 | 3~21*01    | 6*01    | Undetermined     |
| 45441 | Extended Interval | Submental LN       | H914598 | 4~59*01    | 3~3*01     | 6*02    | 7.41  | 18 | IgA | K907464 | 2~28*01    | 1*01    | Undetermined     |

|       |           |      |         |            |           |      |      |    |     |         |         |      |              |
|-------|-----------|------|---------|------------|-----------|------|------|----|-----|---------|---------|------|--------------|
| 45838 | 3M-052-SE | PBMC | H020493 | 3~43*02    | 6~13*01   | 4*02 | 5.31 | 10 | IgG | L020321 | 3~19*01 | 2*01 | Undetermined |
| 45840 | 3M-052-SE | PBMC | H020481 | 4~61*01,08 | 3~3*01,02 | 4*02 | 6.32 | 13 | IgG | K020401 | 2~30*01 | 1*01 | V3           |
| 45840 | 3M-052-SE | PBMC | H020485 | 4~39*06    | 3~3*01,02 | 4*02 | 6.12 | 13 | IgG | K020402 | 2~40*01 | 1*01 | V3           |
| 45840 | 3M-052-SE | PBMC | H020488 | 3~43*02    | 6~13*01   | 4*02 | 4.77 | 10 | IgG | K020402 | 2~40*01 | 1*01 | Undetermined |
| 45851 | 3M-052-SE | PBMC | H020495 | 3~15*08    | 0~IR*01C  | 3*01 | 7.03 | 11 | IgG | K020407 | 2~40*01 | 1*01 | Undetermined |
| 45851 | 3M-052-SE | PBMC | H020494 | 4~39*06    | 3~3*01,02 | 4*02 | 6.89 | 13 | IgG | K020409 | 2~30*01 | 1*01 | Undetermined |
| 45851 | 3M-052-SE | PBMC | H020500 | 4~59*01    | 6~13*01   | 1*01 | 4.21 | 10 | IgA | L020324 | 5~48*01 | 1*01 | V3           |
| 45851 | 3M-052-SE | PBMC | H020498 | 5~51*01    | 3~10*01   | 5*01 | 4.15 | 13 | IgG | L020327 | 1~50*01 | 2*01 | V3           |
| 45851 | 3M-052-SE | PBMC | H020499 | 3~43*02    | 2~8*02    | 4*02 | 5.61 | 16 | IgG | L020326 | 6~57*01 | 7*01 | Undetermined |
| 45851 | 3M-052-SE | PBMC | H020505 | 4~59*01    | 1~1*01    | 1*01 | 4.21 | 10 | IgM | L020329 | 6~57*01 | 7*01 | V3           |
| 45851 | 3M-052-SE | PBMC | H020501 | 4~39*06    | 3~3*01,02 | 4*02 | 6.63 | 13 | IgG | L020328 | 5~48*01 | 1*01 | V3           |
| 45851 | 3M-052-SE | PBMC | H020504 | 3~43*02    | 6~13*01   | 4*02 | 5.31 | 10 | IgG | L020329 | 6~57*01 | 7*01 | Undetermined |
| 45851 | 3M-052-SE | PBMC | H020506 | 4~39*06    | 3~3*01,02 | 1*01 | 6.38 | 13 | IgE | L020333 | 6~57*01 | 7*01 | V3           |
| 45851 | 3M-052-SE | PBMC | H020496 | 3~43*02    | 2~8*02    | 4*02 | 5.57 | 16 | IgG | K020407 | 2~40*01 | 1*01 | Undetermined |
| 45851 | 3M-052-SE | PBMC | H020497 | 4~59*01    | 1~1*01    | 1*01 | 3.95 | 10 | IgG | K020409 | 2~30*01 | 1*01 | V3           |

258

259 **Epitope specificities and immunogenetics of vaccine-elicited Env-**  
 260 **specific memory BCR repertoires did not differ across vaccination**  
 261 **groups.**

262 We next characterized the immunogenetics and epitope specificities of the HIV Env vaccine-  
 263 elicited mAbs. In our initial analysis, the identification of functional heavy and light chains and  
 264 their immunogenetic characteristics was conducted using a previously validated bioinformatic  
 265 method for rhesus BCR repertoire characterization using the human Ig sequence database (28,  
 266 30) (Table 1). Notably, the majority of identified functional heavy- and light-chain Ig pairs were  
 267 of IgG isotype (31 functional pairs) with IgA and IgM isotypes represented in 4 and 3 functional  
 268 pairs, respectively (Fig 2A and Table 1). Most mAbs were specific to the HIV Env V3 loop (14  
 269 functional Ig pairs) followed by V1V2 loop-specific mAbs (5 functional pairs). Only one  
 270 functional pair targeting the CD4 binding site was identified, and we were unable to determine  
 271 the epitope specificities of 18 functional heavy and light chains pairs. These data are consistent  
 272 with our prior observations which demonstrated that most of the polyclonal plasma antibody  
 273 response in these vaccinated infant macaques was directed against the HIV Env V3 region (25,  
 274 26).

275 Recent advances in genome sequencing and detailed characterization of rhesus Ig loci  
 276 provided better understanding of allelic diversity in rhesus Ig genes (32-34). Moreover, the  
 277 availability of rhesus Ig gene libraries (32) provided the opportunity to reanalyze the 39  
 278 functional Ig pairs that we previously identified using the human Ig sequence database. This  
 279 secondary analysis confirmed that 26 of 39 Ig pairs were indeed functional (Table 2) with 5 Ig  
 280 pairs in group 1 (protein only), 7 Ig pairs in group 2 (coadministration), 8 Ig pairs in group 3



281 (extended interval), and 6 Ig pairs in group 4 (3M-052-SE) (Fig 2B). Similar to earlier analysis  
 282 using the human Ig sequence database, the majority of identified functional heavy- and light-  
 283 chain Ig pairs are of IgG isotype (21 functional pairs). Based on the rhesus Ig sequence database,  
 284 the variable heavy chain (VH) gene usage was largely restricted to the VH3 and VH4 gene  
 285 families, across all the vaccination groups, and there was no apparent difference in VH usage in  
 286 the 3M-052-SE group as compared to the other vaccination groups (Table 2). The majority of the  
 287 Ig pairs confirmed as functional in the secondary analysis were against undefined epitopes (12 Ig  
 288 pairs), whereas 6 pairs were specific to the V3 loop and 5 pairs targeted the V1V2 loop. This  
 289 suggests that an important proportion of the vaccine-elicited mAbs were against non-linear  
 290 conformational epitopes on the HIV Env.

291  
 292 **Figure 2. Epitope specificity and immunogenetic characteristics of infant vaccine-elicited**  
 293 **envelope-specific functional heavy chain and light chain pairs.** (A) Initial analysis with  
 294 human immunoglobulin (Ig) database indicated a total of 39 heavy and light chain pairs isolated  
 295 from antigen-specific B cells from infant PBMCs and tissues were reactive to HIV envelope  
 296 (Env-reactive). Epitope specificity, VH gene family usage and isotype distribution of identified  
 297 functional heavy and light chains are displayed in concentric circles. The number of mAbs per  
 298 group is displayed in the center. (B) Reanalysis using newly developed software based on rhesus  
 299 macaque Ig sequences confirmed that 26 of 39 heavy chain and light chain pairs were functional.

300  
 301 **Table 2. Immunogenetic characteristics of isolated envelope (Env)-reactive mAbs of Env-**  
 302 **vaccinated infant monkeys based on rhesus macaque immunoglobulin database analysis.** A  
 303 total of 26 pairs of potentially Env-reactive mAbs were isolated from the four vaccination groups  
 304 across several anatomic compartments. Frequency of gene usage, percent somatic  
 305 hypermutation, and complementarity-region 3 (CDR3) length are displayed for the heavy and  
 306 light chains for each mAb along with the isotype and epitope specificity.

307

| Anim al ID | Group            | Tissue             | IgH ID   | V <sub>H</sub> gene | D <sub>H</sub> gene | J <sub>H</sub> gene | HC % SHM | HC CDR3 length | Ig Isotype | IgL ID   | V <sub>L</sub> /V <sub>K</sub> gene | J <sub>L</sub> /J <sub>K</sub> gene | Specificity  |
|------------|------------------|--------------------|----------|---------------------|---------------------|---------------------|----------|----------------|------------|----------|-------------------------------------|-------------------------------------|--------------|
| 45521      | Protein Only     | Spleen             | H691 207 | IGHV 4-j*02         | IGHD 3-9*01         | IGHJ 5-2*01         | 3.82     | 23             | IgG        | K690 414 | IGKV 1-n*01                         | IGKJ 2-1*01                         | Undetermined |
| 45521      | Protein Only     | Retropharyngeal LN | H691 248 | IGHV 4-j*02         | IGHD 3-9*01         | IGHJ 5-2*01         | 5.21     | 23             | IgA        | K690 428 | IGKV 1-n*01                         | IGKJ 2-1*01                         | Undetermined |
| 45521      | Protein Only     | Retropharyngeal LN | H691 255 | IGHV 4-j*03         | IGHD 3-9*01         | IGHJ 5-2*01         | 4.51     | 23             | IgG        | K690 431 | IGKV 1-n*01                         | IGKJ 2-1*01                         | Undetermined |
| 45521      | Protein Only     | Retropharyngeal LN | H691 256 | IGHV 4-j*02         | IGHD 3-9*01         | IGHJ 5-2*01         | 3.82     | 23             | IgG        | K690 432 | IGKV 1-n*01                         | IGKJ 2-1*01                         | Undetermined |
| 45522      | Protein Only     | Spleen             | H691 308 | IGHV 4-n*01         | IGHD 6-24*01        | IGHJ 4*01           | 7.90     | 13             | IgG        | L690 936 | IGLV 1-e*01                         | IGLJ 3*01                           | Undetermined |
| 45083      | Coadministration | Spleen             | H691 279 | IGHV 4-f*02         | IGHD 6-34*01        | IGHJ 4*01           | 7.56     | 13             | IgM        | L690 918 | IGLV 1-b*01                         | IGLJ 3*01                           | V1V2         |
| 45083      | Coadministration | Mediastinal LN     | H691 285 | IGHV 4-g*02         | IGHD 3-26*01        | IGHJ 4*01           | 4.17     | 17             | IgG        | K690 448 | IGKV 1-a*01                         | IGKJ 2-1*01                         | V1V2         |
| 45083      | Coadministration | Mediastinal LN     | H691 285 | IGHV 4-g*02         | IGHD 3-26*01        | IGHJ 4*01           | 4.17     | 17             | IgG        | L690 922 | IGLV 2-i*01                         | IGLJ 1*01                           | V3           |

|       |                   |                |         |             |             |            |       |    |     |         |             |            |                  |
|-------|-------------------|----------------|---------|-------------|-------------|------------|-------|----|-----|---------|-------------|------------|------------------|
| 45083 | Coadministration  | Mediastinal LN | H691289 | IGHV4-f*03  | IGHD5-5*02  | IGHJ4*01   | 5.15  | 13 | IgG | L690925 | IGLV2-a*01  | IGLJ1*01   | Undetermined     |
| 45091 | Coadministration  | Axillary LN    | H691299 | IGHV3-g*03  | IGHD4-4*02  | IGHJ6*01   | 6.80  | 14 | IgG | L690932 | IGLV11-a*01 | IGLJ2*03   | Undetermined     |
| 45091 | Coadministration  | Axillary LN    | H691306 | IGHV4-j*02  | IGHD4-22*01 | IGHJ4*01   | 5.15  | 17 | IgG | K690454 | IGKV1-e*05  | IGKJ4-1*01 | V3               |
| 45091 | Coadministration  | PBMC           | H691004 | IGHV3-al*01 | IGHD3-3*01  | IGHJ4*01   | 7.99  | 19 | IgG | L690726 | IGLV3-c*02  | IGLJ2*03   | CD4 binding site |
| 45435 | Extended Interval | Mediastinal LN | H691315 | IGHV4-f*03  | IGHD3-21*01 | IGHJ3*01   | 7.22  | 18 | IgG | K690458 | IGKV1-f*04  | IGKJ4-1*01 | V1V2             |
| 45435 | Extended Interval | Mediastinal LN | H691312 | IGHV4-j*02  | IGHD1-39*01 | IGHJ5-1*01 | 5.56  | 16 | IgG | K690456 | IGKV1-n*01  | IGKJ2-1*01 | CD4 binding site |
| 45435 | Extended Interval | Mediastinal LN | H691321 | IGHV3-al*01 | IGHD3-14*01 | IGHJ6*01   | 2.43  | 17 | IgG | K690463 | IGKV1-r*01  | IGKJ2-1*01 | V1V2             |
| 45435 | Extended Interval | Mediastinal LN | H691322 | IGHV3-r*02  | IGHD6-29*01 | IGHJ6*01   | 2.43  | 12 | IgG | K690464 | IGKV3-c*01  | IGKJ1-1*01 | V1V2             |
| 45441 | Extended Interval | Spleen         | H691341 | IGHV3-y*03  | IGHD4-22*01 | IGHJ6*01   | 4.86  | 0  | IgG | K690472 | IGKV1-a*01  | IGKJ1-1*01 | Undetermined     |
| 45441 | Extended Interval | Spleen         | H691346 | IGHV4-j*02  | IGHD3-21*01 | IGHJ4*01   | 13.75 | 0  | IgG | L690948 | IGLV1-e*01  | IGLJ7*01   | CD4 binding site |
| 45441 | Extended Interval | Spleen         | H691343 | IGHV3-y*03  | IGHD2-25*01 | IGHJ1*01   | 5.21  | 15 | IgG | L690946 | IGLV2-j*16  | IGLJ6*01   | Undetermined     |
| 45441 | Extended Interval | Submental LN   | H691216 | IGHV4-j*02  | IGHD3-3*01  | IGHJ6*01   | 1.39  | 18 | IgA | K690417 | IGKV2-d*03  | IGKJ1-1*01 | Undetermined     |
| 45851 | 3M-052-SE         | PBMC           | H680141 | IGHV3-l*02  | IGHD5-23*01 | IGHJ5-2*01 | 0.00  | 11 | IgG | K680049 | IGKV2-r*01  | IGKJ1-1*01 | Undetermined     |
| 45851 | 3M-052-SE         | PBMC           | H680144 | IGHV4-m*02  | IGHD1-A*01  | IGHJ4*01   | 2.38  | 13 | IgG | K680048 | IGKV2-g*01  | IGKJ1-1*01 | Undetermined     |
| 45851 | 3M-052-SE         | PBMC           | H680146 | IGHV4-f*02  | IGHD6-24*01 | IGHJ4*01   | 4.47  | 10 | IgD | L680105 | IGLV5-b*01  | IGLJ1*01   | V3               |
| 45851 | 3M-052-SE         | PBMC           | H680147 | IGHV5-b*02  | IGHD7-A*01  | IGHJ6*01   | 2.43  | 13 | IgG | L680103 | IGLV1-d*01  | IGLJ2*03   | V3               |
| 45851 | 3M-052-SE         | PBMC           | H680149 | IGHV4-f*02  | IGHD6-24*01 | IGHJ4*01   | 5.15  | 10 | IgE | L680109 | IGLV6-c*01  | IGLJ2*03   | V3               |
| 45851 | 3M-052-SE         | PBMC           | H680150 | IGHV4-m*02  | IGHD1-A*01  | IGHJ4*01   | 2.04  | 13 | IgG | L680108 | IGLV5-b*01  | IGLJ1*01   | V3               |

308

309 **Frequency of somatic hypermutation and heavy chain**  
 310 **complementarity-determining region 3 (HCDR3) length in HIV**  
 311 **Env-specific Ig pairs did not differ across vaccination groups.**

312 We also sought to define whether increased somatic hypermutation and affinity maturation in  
 313 Env-specific Ig pairs could potentially contributed to distinct plasma antibody responses induced  
 314 by different pediatric HIV vaccine regimens (25, 26). Based on the preliminary Ig sequence  
 315 analysis using the human Ig gene database, the frequency of somatic hypermutation (SHM) was

316 comparable across the vaccination groups (Fig 3A) with range of SMH of 5.31-10.03% in group  
317 1 (protein only), 4.52-10.15% in group 2 (coadministration), 6.05-11.08% in group 3 (extended  
318 interval), and 4.15-7.03% in group 4 (3M-052-SE) (Table 1). Additionally, the HCDR3 of Env-  
319 reactive functional pairs were comparable across all vaccination groups, with HCDR3 length  
320 range of 10-23 aa. The highest median HCDR3 length was observed in the protein only group  
321 (median length of 23 aa) and the lowest was observed in the 3M-052-SE group (median length of  
322 13 aa). The HCDR3 median length in group 2 (coadministration) and 3 (extended interval) was  
323 14 aa and 17 aa, respectively.

324

325 **Fig 3. Frequency of somatic hypermutation and heavy chain complementarity-determining**  
326 **region 3 (HCDR3) length of vaccine-elicited envelope (Env)-reactive functional heavy and**  
327 **light chains identified from infants.** (A) Analysis of percent somatic hypermutation frequency  
328 and HCDR3 lengths for Env-reactive heavy and light chains pairs (39 mAb pairs) from infant  
329 antigen-specific B cells based on human immunoglobulin (Ig) sequence database. (B) Analysis  
330 of percent somatic hypermutation frequency and HCDR3 lengths for Env-reactive heavy and  
331 light chains pairs (26 mAb pairs) from antigen-specific B cells based on rhesus macaque Ig  
332 sequence database. Horizontal lines indicated median values of individual groups. Corresponding  
333 functional heavy and light chains isolated from individual infants are denoted by symbols.

334

335 Comparable SHM frequency across the groups was confirmed with the secondary  
336 analysis based on the rhesus Ig sequence database (Fig 3B and Table 2), albeit mutation rates  
337 were slightly lower compared to the initial analysis using the human Ig sequence database. The  
338 range of SHM was 3.82-7.9% in group 1 (protein only), 4.17-7.99% in the group 2  
339 (coadministration), 1.39-13.75% in group 3 (extended interval), and 0-5.15% in group 4 (3M-  
340 052-SE) (Table 2). The HCDR3 length of Env-reactive functional pairs was also comparable  
341 across all vaccination groups. Similar to human Ig sequence, the highest median HCDR3 region  
342 was observed in group 1 (protein only) and the lowest median HCDR3 region was observed in  
343 group 4 (3M-052-SE). Interestingly, the median HCDR3 length in group 2 (coadministration)  
344 was lower based on human Ig sequence database (median HCDR3 length of 14 aa) than the  
345 rhesus Ig sequence (median HCDR3 length of 17 aa). Meanwhile, the median HCDR3 length for  
346 group 3 (extended interval) was lower with the rhesus IgG sequence (median HCDR3 length of  
347 15 aa) than in the human Ig sequence (median HCDR3 length of 17 aa). These findings highlight  
348 the limitations of using human database to analyze the BCR repertoire in rhesus.

349

350 Altogether, our data suggest that the magnitude and quality of vaccine-elicited plasma  
351 Env-specific antibody responses administered with different adjuvants are not related to the size  
352 of the antigen-specific memory B cell pool or to the immunogenetics characteristics of the  
353 vaccine-elicited Ig pairs.

353

## 354 Discussion

355 Based on previous observations that different pediatric HIV vaccine regimens induced distinct  
356 plasma antibody responses (25, 26), the goal of this study was to investigate whether these  
357 responses were driven by distinct memory BCR repertoire characteristics including distinct Ig  
358 gene usage, rates of SHM and HCDR3 lengths. We utilized samples from 2 completed  
359 immunization studies (25, 26), in which newborn infant rhesus macaques were immunized with  
360 four distinct vaccine regimens (Figure 1). Our results indicate that although the different vaccine

361 regimens induced distinct plasma antibody responses, there were no significant differences in the  
362 B cell repertoires.

363 The development of a safe and effective pediatric HIV-1 vaccine to eliminate postnatal  
364 infant HIV-1 infections will probably require the use of novel adjuvants such as Toll-like  
365 receptor (TLR) agonists. Indeed, recent studies have demonstrated that TLR7/8 adjuvantation  
366 can enhance vaccine responses in early life (35-37). Notably, our group recently reported that an  
367 HIV vaccine adjuvanted with 3M-052-SE induces superior plasma antibody levels than other  
368 adjuvanted HIV regimens in infant rhesus macaques (26). We showed that antibody levels  
369 against autologous and heterologous envelope proteins, and observed that overall, the magnitude  
370 of the vaccine-elicited antibody response was higher in the 3M-052-SE group (Supplemental  
371 figure 1A-C). However, the impact of these different pediatric HIV Env vaccine regimens on the  
372 developing infant antigen-specific B cell BCR repertoires is still unclear.

373 Previous study investigating the BCR repertoire in HIV immunized adult monkeys have  
374 reported a preferential usage of the VH4 and VH3 families (28). Our initial analysis of the BCR  
375 repertoire in the vaccinated infant rhesus macaques was conducted using the same human Ig  
376 sequence database and bioinformatics methods, in which we similarly observed that 69% of the  
377 infant Env-specific functional heavy and light chains in this study used VH4 genes and 26% use  
378 VH3 genes (Table 1). However, we found that the Env-specific functional heavy and light chains  
379 in infant rhesus macaques were slightly shorter and had lower mutation rates than in adults. For  
380 example, in adult rhesus macaques immunized with a pox prime/protein boost regimen the  
381 median HCDR3 length after the fifth immunization was 16 aa and the SHM rate was 9.3%.  
382 Meanwhile, in our study the overall median HCDR3 length across all vaccination groups was 14  
383 aa and the SMH rate was 6.3%. The lower levels of SHM rate in infant rhesus macaques as  
384 compared to adult rhesus macaques is in accordance with the observation that SHM rate  
385 increases with age. Moreover, broadly neutralizing antibodies (bNAbs) isolated from HIV-  
386 infected pediatric patients (1-year post-infection) also have lower levels of SHM rate than HIV-  
387 infected adult bNAbs directed against the same epitopes (38).

388 Due to their close genetic similarity to humans, rhesus macaques are valuable animal  
389 model for studies of infectious diseases including the understanding of vaccine-elicited immune  
390 responses. However, despite their wide usage as a human surrogate model system, many aspects  
391 of the rhesus macaque immune system are still under characterized and poorly annotated. Recent  
392 advances in high-throughput NGS and specialized computational methods provide tools to the  
393 scientific community to compare rhesus repertoires of heavy and light-chains to humans in order  
394 to better understand how they may perform as a model system for B- and T-cell mediated  
395 immunity in humans (39-41). Characterization of human and rhesus BCR repertoires showed  
396 that the frequency of V- and J-gene segment usage and HCDR3 lengths between human and  
397 rhesus were in concordance with one another (39, 42). However, comparative analyses of  
398 different Ig subtypes (IgM, IgG, IgK and IgL) sequences revealed significant differences in the  
399 overall BCR repertoires. Rhesus macaques have higher diversity of BCR repertoires with  
400 different family gene usage and slight difference in the frequencies of HCDR3 lengths within the  
401 IgM<sup>+</sup> BCR repertoires, likely due to gene family usage in the class-switched (IgG) compartment  
402 (39). However, importantly, the low abundance of long CDRH3s in rhesus IgM<sup>+</sup> B cells did not  
403 impede their expansion into the IgG<sup>+</sup> B cells, and in rhesus IgG<sup>+</sup> B cell frequency was  
404 comparable to human IgG<sup>+</sup> B cells. Thus, given the complexity of gene recombination, high  
405 diversity in rhesus BCR repertoires, and the close genetic relationship between rhesus and

406 humans, it is likely that rhesus B-cell compartment recapitulates its human counterpart and is  
407 poised to respond to antigen in similar manners.

408 Historically, a limitation of BCR repertoire analysis in the nonhuman primate (NHP)  
409 model has been the lack of rhesus macaque Ig sequence database. Recent development of  
410 bioinformatics tools that enable comparison of Ig sequences from immunized animals to a NHP  
411 reference database allows for a more accurate characterization of the BCR repertoire in response  
412 to vaccination or infection. We found some differences in BCR repertoire characteristics  
413 including VH usage, SMH rate, and Ig subclass/isotypes when the same Ig pairs were analyzed  
414 using human Ig and rhesus Ig sequence databases (Figure 1A-B, Table 1-2). Notably only 26 of  
415 39 pairs identified as functional based on the human Ig sequence database were confirmed to be  
416 functional using the rhesus Ig sequence database. This could be due to high sequence homology  
417 using the rhesus Ig sequence database compared to human Ig sequence database. These findings  
418 highlight the importance of species-specific database for comprehensive understanding of the  
419 BCR repertoire and antibody maturation in response to vaccinations and/or infections using the  
420 rhesus macaque model.

421 Interestingly, the observed SHM rate in infants across all vaccinations groups in this  
422 study (4.7%) is only slightly higher than the observed SHM rate in human HIV vaccine trials  
423 such as GSK PRO HIV-002 (3.8%) and the RV144 trial (2.4%). HIV-1-infected infants have  
424 been shown to develop neutralization breadth earlier than HIV-infected adults. Plasma antibody  
425 responses in HIV-infected infants neutralized a panel of diverse HIV-1 viruses, including more  
426 difficult to neutralize cross clade variants (43). Additionally, these responses were observed as  
427 early as 1 to 2 years post-infection. Furthermore, bNAbs isolated from pediatric HIV cases  
428 appeared to have lower levels of SHM when compared to bNAbs isolated from HIV-infected  
429 adults (38). Altogether, these data suggest that induction of HIV-1-specific plasma antibody  
430 neutralization can be achieved in children without prolonged extensive SHM and affinity  
431 maturation.

432

## 433 **Conclusion**

434 Our results suggest that the high plasma antibody magnitude and functionality achieved with  
435 3M-052-SE adjuvantation is not accompanied by distinct B cell repertoire characteristics.  
436 Nevertheless, our study is limited by the distinct vaccine regimens used and the low number of  
437 functional heavy and light chain pairs identified from the different vaccination groups. Further  
438 investigation of the mechanism by which the 3M-052-SE adjuvant leads to enhanced immune  
439 responses in the setting of the developing early life immune system are warranted. Additionally,  
440 it will be important to evaluate whether the enhanced immunogenicity of HIV vaccines with 3M-  
441 052-SE adjuvantation in infants is associated with protection from oral virus exposure.

442

## 443 **Acknowledgements**

444 We would like to thank Carolyn Weinbaum for her contribution in animal study and sample  
445 coordination. Flow cytometry and single cell sorting was performed at the Duke Human Vaccine  
446 Institute (DHVI) Flow Cytometry Facility, Duke University, Durham, NC.

447

## 448 **Funding**

449 This work was supported by grant P01 AI117915 from the (National Institute of Allergy and  
450 Infectious Diseases (NIAID) to KDP and SRP, and P51OD011107 (Office of Research  
451 Infrastructure Program, Office of The Director, NIH) to CNPRC. SJB is supported by the  
452 Interdisciplinary Research and Training Program in AIDS (5T32AI007392-31), Duke  
453 University.

454

## 455 **References**

- 456 1. Organization WH. HIV/AIDS 2019 [Available from: [https://www.who.int/news-](https://www.who.int/news-room/fact-sheets/detail/hiv-aids)  
457 [room/fact-sheets/detail/hiv-aids](https://www.who.int/news-room/fact-sheets/detail/hiv-aids).
- 458 2. Haas AD MM, Egger M, Tenthani L, Tweya H, Jahn A, Gadabu OJ, Tal K, Salazar-  
459 Vizcaya L, Estill J, Spoerri A, Phiri N, Chimbwandira F, van Oosterhout JJ, Keiser O.  
460 Adherence to Antiretroviral Therapy During and After Pregnancy: Cohort Study on Women  
461 Receiving Care in Malawi's Option B+ Program. *Clin Infect Dis*. 2016;63(9):1227-35.  
462 3. Tenthani L HA, Tweya H, Jahn A, van Oosterhout JJ, Chimbwandira F, Chirwa Z,  
463 Ng'ambi W, Bakali A, Phiri S, Myer L, Valeri F, Zwahlen M, Wandeler G, Keiser O. Retention  
464 in care under universal antiretroviral therapy for HIV-infected pregnant and breastfeeding  
465 women ('Option B+') in Malawi. *AIDS*. 2014;28(4):589-98.
- 466 4. Stadeli KM RD. Rates of emergence of HIV drug resistance in resource-limited settings:  
467 a systematic review. *Antivir Ther*. 2015;18(1):115-23.
- 468 5. UNAIDS. Prevention Gap Report. Joint United Nations Programme on HIV/AIDS,  
469 Geneva, Switzerland. 2016.
- 470 6. Drake AL WA, Richardson B, John-Stewart G. Incident HIV during pregnancy and  
471 postpartum and risk of mother-to-child HIV transmission: a systematic review and meta-analysis.  
472 *PloS Med*. 2014;11.
- 473 7. WHO. Global Update on the Health Sector Response to HIV. World Health  
474 Organization, Geneva, Switzerland. 2014.
- 475 8. Siberry GK. Preventing and managing HIV infection in infants, children, and adolescents  
476 in the United States. *Pediatr Rev*. 2014;35(7):268-86.
- 477 9. Gao Y, McKay PF, Mann JFS. Advances in HIV-1 Vaccine Development. *Viruses*.  
478 2018;10(4).
- 479 10. Dolin R, Graham BS, Greenberg SB, Tacket CO, Belshe RB, Midthun K, et al. The  
480 safety and immunogenicity of a human immunodeficiency virus type 1 (HIV-1) recombinant  
481 gp160 candidate vaccine in humans. NIAID AIDS Vaccine Clinical Trials Network. *Ann Intern*  
482 *Med*. 1991;114(2):119-27.
- 483 11. Wright PF, Lambert JS, Gorse GJ, Hsieh RH, McElrath MJ, Weinhold K, et al.  
484 Immunization with envelope MN rgp120 vaccine in human immunodeficiency virus-infected  
485 pregnant women. *J Infect Dis*. 1999;180(4):1080-8.
- 486 12. Belshe RB, Stevens C, Gorse GJ, Buchbinder S, Weinhold K, Sheppard H, et al. Safety  
487 and immunogenicity of a canarypox-vectored human immunodeficiency virus Type 1 vaccine  
488 with or without gp120: a phase 2 study in higher- and lower-risk volunteers. *J Infect Dis*.  
489 2001;183(9):1343-52.

- 490 13. Rerks-Ngarm S, Pitisuttithum P, Nitayaphan S, Kaewkungwal J, Chiu J, Paris R, et al.  
491 Vaccination with ALVAC and AIDSVAX to prevent HIV-1 infection in Thailand. *N Engl J*  
492 *Med.* 2009;361(23):2209-20.
- 493 14. Robb ML, Rerks-Ngarm S, Nitayaphan S, Pitisuttithum P, Kaewkungwal J, Kunasol P, et  
494 al. Risk behaviour and time as covariates for efficacy of the HIV vaccine regimen ALVAC-HIV  
495 (vCP1521) and AIDSVAX B/E: a post-hoc analysis of the Thai phase 3 efficacy trial RV 144.  
496 *Lancet Infect Dis.* 2012;12(7):531-7.
- 497 15. Haynes BF, Gilbert PB, McElrath MJ, Zolla-Pazner S, Tomaras GD, Alam SM, et al.  
498 Immune-correlates analysis of an HIV-1 vaccine efficacy trial. *N Engl J Med.*  
499 2012;366(14):1275-86.
- 500 16. Release. NIOHN. Experimental HIV Vaccine Regimen Ineffective in Preventing HIV. 3  
501 February 2020.
- 502 17. Lin L, Finak G, Ushey K, Seshadri C, Hawn TR, Frahm N, et al. COMPASS identifies T-  
503 cell subsets correlated with clinical outcomes. *Nat Biotechnol.* 2015;33(6):610-6.
- 504 18. Johnson DC, McFarland EJ, Muresan P, Fenton T, McNamara J, Read JS, et al. Safety  
505 and immunogenicity of an HIV-1 recombinant canarypox vaccine in newborns and infants of  
506 HIV-1-infected women. *J Infect Dis.* 2005;192(12):2129-33.
- 507 19. McFarland EJ, Johnson DC, Muresan P, Fenton T, Tomaras GD, McNamara J, et al.  
508 HIV-1 vaccine induced immune responses in newborns of HIV-1 infected mothers. *AIDS.*  
509 2006;20(11):1481-9.
- 510 20. Kaleebu P, Njai HF, Wang L, Jones N, Ssewanyana I, Richardson P, et al.  
511 Immunogenicity of ALVAC-HIV vCP1521 in infants of HIV-1-infected women in Uganda  
512 (HPTN 027): the first pediatric HIV vaccine trial in Africa. *J Acquir Immune Defic Syndr.*  
513 2014;65(3):268-77.
- 514 21. Kintu K, Andrew P, Musoke P, Richardson P, Asiimwe-Kateera B, Nakyanzi T, et al.  
515 Feasibility and safety of ALVAC-HIV vCP1521 vaccine in HIV-exposed infants in Uganda:  
516 results from the first HIV vaccine trial in infants in Africa. *J Acquir Immune Defic Syndr.*  
517 2013;63(1):1-8.
- 518 22. Fouda GG, Cunningham CK, McFarland EJ, Borkowsky W, Muresan P, Pollara J, et al.  
519 Infant HIV type 1 gp120 vaccination elicits robust and durable anti-V1V2 immunoglobulin G  
520 responses and only rare envelope-specific immunoglobulin A responses. *J Infect Dis.*  
521 2015;211(4):508-17.
- 522 23. Van Rompay KK, Greenier JL, Cole KS, Earl P, Moss B, Steckbeck JD, et al.  
523 Immunization of newborn rhesus macaques with simian immunodeficiency virus (SIV) vaccines  
524 prolongs survival after oral challenge with virulent SIVmac251. *J Virol.* 2003;77(1):179-90.
- 525 24. Van Rompay KK, Abel K, Lawson JR, Singh RP, Schmidt KA, Evans T, et al.  
526 Attenuated poxvirus-based simian immunodeficiency virus (SIV) vaccines given in infancy  
527 partially protect infant and juvenile macaques against repeated oral challenge with virulent SIV.  
528 *J Acquir Immune Defic Syndr.* 2005;38(2):124-34.
- 529 25. Phillips B, Fouda GG, Eudailey J, Pollara J, Curtis AD, 2nd, Kunz E, et al. Impact of  
530 Poxvirus Vector Priming, Protein Coadministration, and Vaccine Intervals on HIV gp120  
531 Vaccine-Elicited Antibody Magnitude and Function in Infant Macaques. *Clin Vaccine Immunol.*  
532 2017;24(10).
- 533 26. Phillips B, Van Rompay KKA, Rodriguez-Nieves J, Lorin C, Koutsoukos M, Tomai M,  
534 et al. Adjuvant-Dependent Enhancement of HIV Env-Specific Antibody Responses in Infant  
535 Rhesus Macaques. *J Virol.* 2018;92(20).

- 536 27. Dowling DJ, van Haren SD, Scheid A, Bergelson I, Kim D, Mancuso CJ, et al. TLR7/8  
537 adjuvant overcomes newborn hyporesponsiveness to pneumococcal conjugate vaccine at birth.  
538 JCI Insight. 2017;2(6):e91020.
- 539 28. Luo K, Liao HX, Zhang R, Easterhoff D, Wiehe K, Gurley TC, et al. Tissue memory B  
540 cell repertoire analysis after ALVAC/AIDS VAX B/E gp120 immunization of rhesus macaques.  
541 JCI Insight. 2016;1(20):e88522.
- 542 29. Liao HX, Levesque MC, Nagel A, Dixon A, Zhang R, Walter E, et al. High-throughput  
543 isolation of immunoglobulin genes from single human B cells and expression as monoclonal  
544 antibodies. J Virol Methods. 2009;158(1-2):171-9.
- 545 30. Wiehe K, Easterhoff D, Luo K, Nicely NI, Bradley T, Jaeger FH, et al. Antibody light-  
546 chain-restricted recognition of the site of immune pressure in the RV144 HIV-1 vaccine trial is  
547 phylogenetically conserved. Immunity. 2014;41(6):909-18.
- 548 31. Kepler TB. Reconstructing a B-cell clonal lineage. I. Statistical inference of unobserved  
549 ancestors. F1000Res. 2013;2:103.
- 550 32. Ramesh A, Darko S, Hua A, Overman G, Ransier A, Francica JR, et al. Structure and  
551 Diversity of the Rhesus Macaque Immunoglobulin Loci through Multiple De Novo Genome  
552 Assemblies. Front Immunol. 2017;8:1407.
- 553 33. Cirelli KM, Carnathan DG, Nogal B, Martin JT, Rodriguez OL, Upadhyay AA, et al.  
554 Slow Delivery Immunization Enhances HIV Neutralizing Antibody and Germinal Center  
555 Responses via Modulation of Immunodominance. Cell. 2019;177(5):1153-71 e28.
- 556 34. Vazquez Bernat N, Corcoran M, Nowak I, Kaduk M, Castro Dopico X, Narang S, et al.  
557 Rhesus and cynomolgus macaque immunoglobulin heavy-chain genotyping yields  
558 comprehensive databases of germline VDJ alleles. Immunity. 2021;54(2):355-66 e4.
- 559 35. Holbrook BC, Aycock ST, Machiele E, Clemens E, Gries D, Jorgensen MJ, et al. An  
560 R848 adjuvanted influenza vaccine promotes early activation of B cells in the draining lymph  
561 nodes of non-human primate neonates. Immunology. 2018;153(3):357-67.
- 562 36. Holbrook BC, D'Agostino RB, Jr., Tyler Aycock S, Jorgensen MJ, Hadimani MB, Bruce  
563 King S, et al. Adjuvanting an inactivated influenza vaccine with conjugated R848 improves the  
564 level of antibody present at 6 months in a nonhuman primate neonate model. Vaccine.  
565 2017;35(45):6137-42.
- 566 37. Holbrook BC, Kim JR, Blevins LK, Jorgensen MJ, Kock ND, D'Agostino RB, Jr., et al.  
567 A Novel R848-Conjugated Inactivated Influenza Virus Vaccine Is Efficacious and Safe in a  
568 Neonate Nonhuman Primate Model. J Immunol. 2016;197(2):555-64.
- 569 38. Simonich CA, Williams KL, Verkerke HP, Williams JA, Nduati R, Lee KK, et al. HIV-1  
570 Neutralizing Antibodies with Limited Hypermutation from an Infant. Cell. 2016;166(1):77-87.
- 571 39. Vigdorovich V, Oliver BG, Carbonetti S, Dambrauskas N, Lange MD, Yacoob C, et al.  
572 Repertoire comparison of the B-cell receptor-encoding loci in humans and rhesus macaques by  
573 next-generation sequencing. Clin Transl Immunology. 2016;5(7):e93.
- 574 40. Brochu HN, Tseng E, Smith E, Thomas MJ, Jones AM, Diveley KR, et al. Systematic  
575 Profiling of Full-Length Ig and TCR Repertoire Diversity in Rhesus Macaque through Long  
576 Read Transcriptome Sequencing. J Immunol. 2020;204(12):3434-44.
- 577 41. Zhang W, Li X, Wang L, Deng J, Lin L, Tian L, et al. Identification of Variable and  
578 Joining Germline Genes and Alleles for Rhesus Macaque from B Cell Receptor Repertoires. J  
579 Immunol. 2019;202(5):1612-22.



- 580 42. Dai K, He L, Khan SN, O'Dell S, McKee K, Tran K, et al. Rhesus Macaque B-Cell  
581 Responses to an HIV-1 Trimer Vaccine Revealed by Unbiased Longitudinal Repertoire Analysis.  
582 mBio. 2015;6(6):e01375-15.
- 583 43. Goo L, Chohan V, Nduati R, Overbaugh J. Early development of broadly neutralizing  
584 antibodies in HIV-1-infected infants. Nat Med. 2014;20(6):655-8.  
585

## 586 Supplemental Figures Legends

- 587 **S1 Fig. Characterization of vaccination-induced plasma envelope IgG responses in infant**  
588 **rhesus macaques.** Envelope binding IgG responses against 1086d7gp120K160N by ELISA. (A)  
589 Peak immunogenicity gp120 specific IgG responses by ELISA. (B) Variable and conserved  
590 epitope specific IgG responses at peak immunogenicity by BAMA. (C) Avidity 1/k off (the  
591 inverse of the dissociation rate) was plotted as a measure of the strength of binding and avidity  
592 scores which take into consideration the magnitude are also shown. (D) Overall, the 3M-052  
593 group had higher magnitude of binding antibody responses and higher avidity strength against  
594 most of the tested antigens. \* denoted significant p-values ( $p < 0.05$ ) by Mann-Whitney U Test,  
595 FDR-adjusted. Data published in Phillips et al., 2017 and Phillips et al., 2018.
- 596 **S2 Fig. Frequency of Env-specific memory B cells in sorted tissues and PBMCs of envelope-**  
597 **vaccinated infant monkeys.** (A) Percentage of memory B cells (CD20+CD27+IgD-), which are  
598 envelope-specific double positive cells for 1086.C gp120 (tagged with two colors-BV421 and  
599 AF647) for single-cell sorting. (B) Representative gating strategy for single-cell HIV Env-  
600 specific memory B cell sorting by flow cytometry.

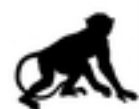

**Group 1: Protein only**  
MVA-SIV gag/pol ( $5 \times 10^8$  IU, IM) [●] +  
HIV Env 1086c (15ug STS adjuvant, IM +  
200ug R484 adjuvant, IN) [■]  
(n = 5)

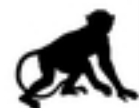

**Group 2: Coadministration**  
MVA-SIV gag/pol ( $5 \times 10^8$  IU, IM) [●] +  
HIV Env 1086c (15ug STS adjuvant, IM +  
200ug R484 adjuvant, IN) [■]  
MVA-HIV Env ( $5 \times 10^8$  IU, IM) [▼], (n = 5)

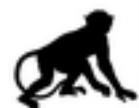

**Group 3: Extended Interval**  
MVA-SIV gag/pol ( $5 \times 10^8$  IU, IM) [●] +  
HIV Env 1086c (15ug STS adjuvant, IM +  
200ug R484 adjuvant, IN) [■]  
MVA-HIV Env ( $5 \times 10^8$  IU, IM) [▼], (n = 5)

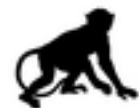

**Group 4: 3M-052-SE**  
HIV Env 1086c/Tv1 bivalent (IM) [◆] +  
3M-052-SE [◆]  
(n = 4)

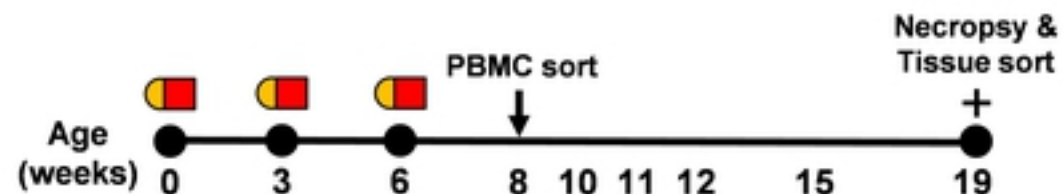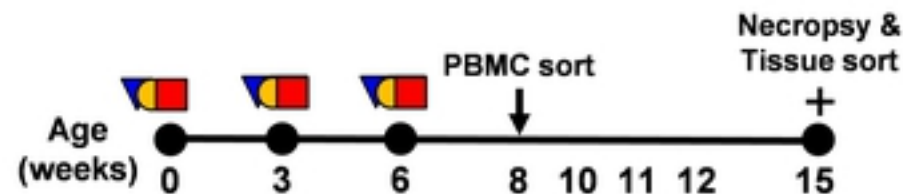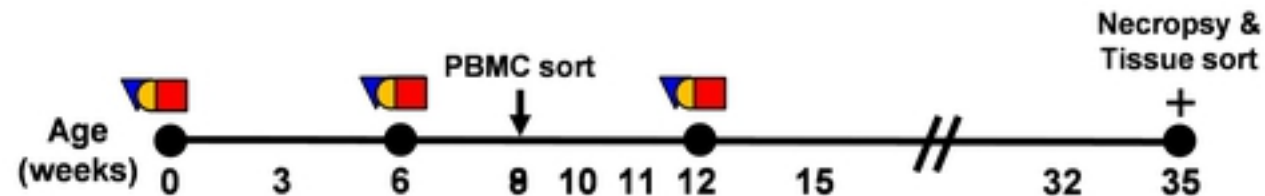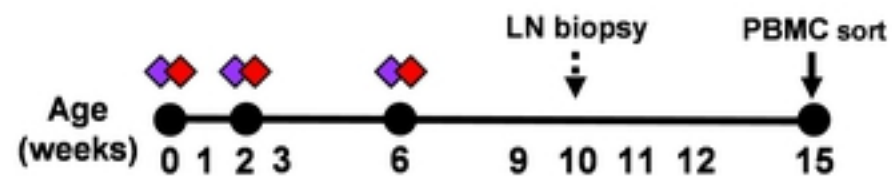

Figure 1

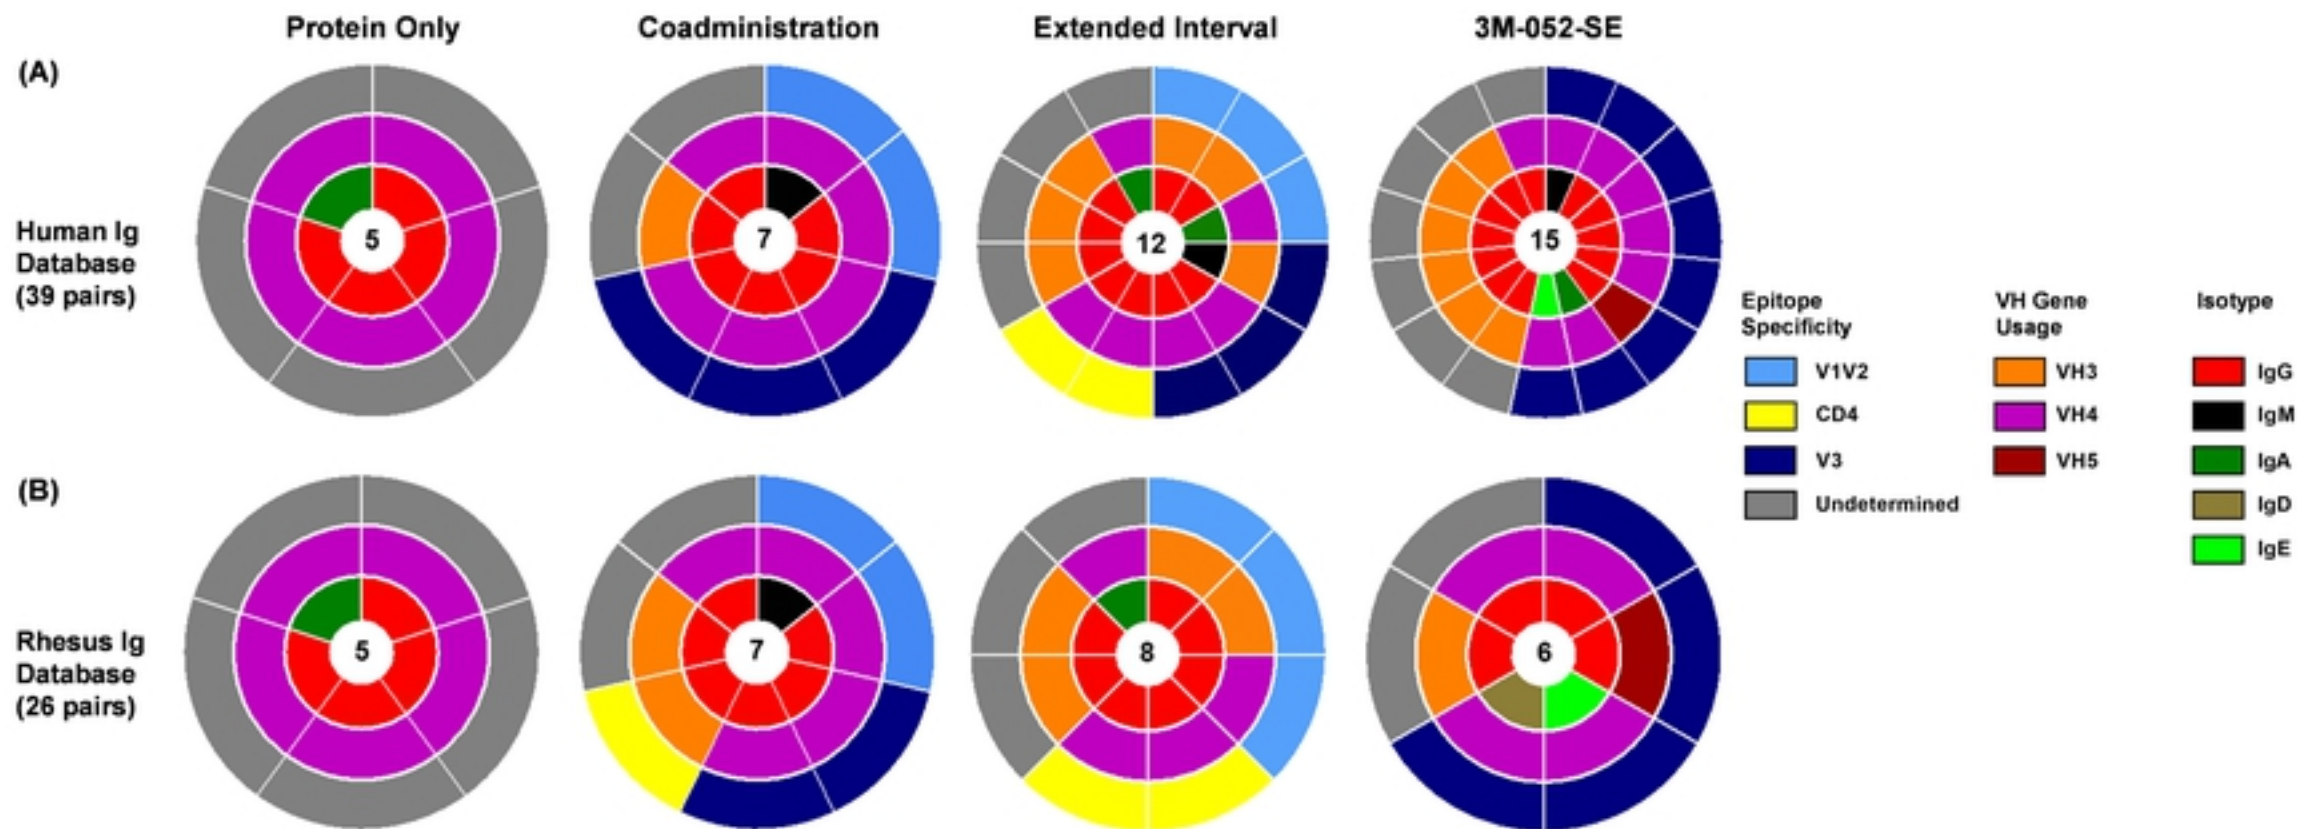

Figure 2

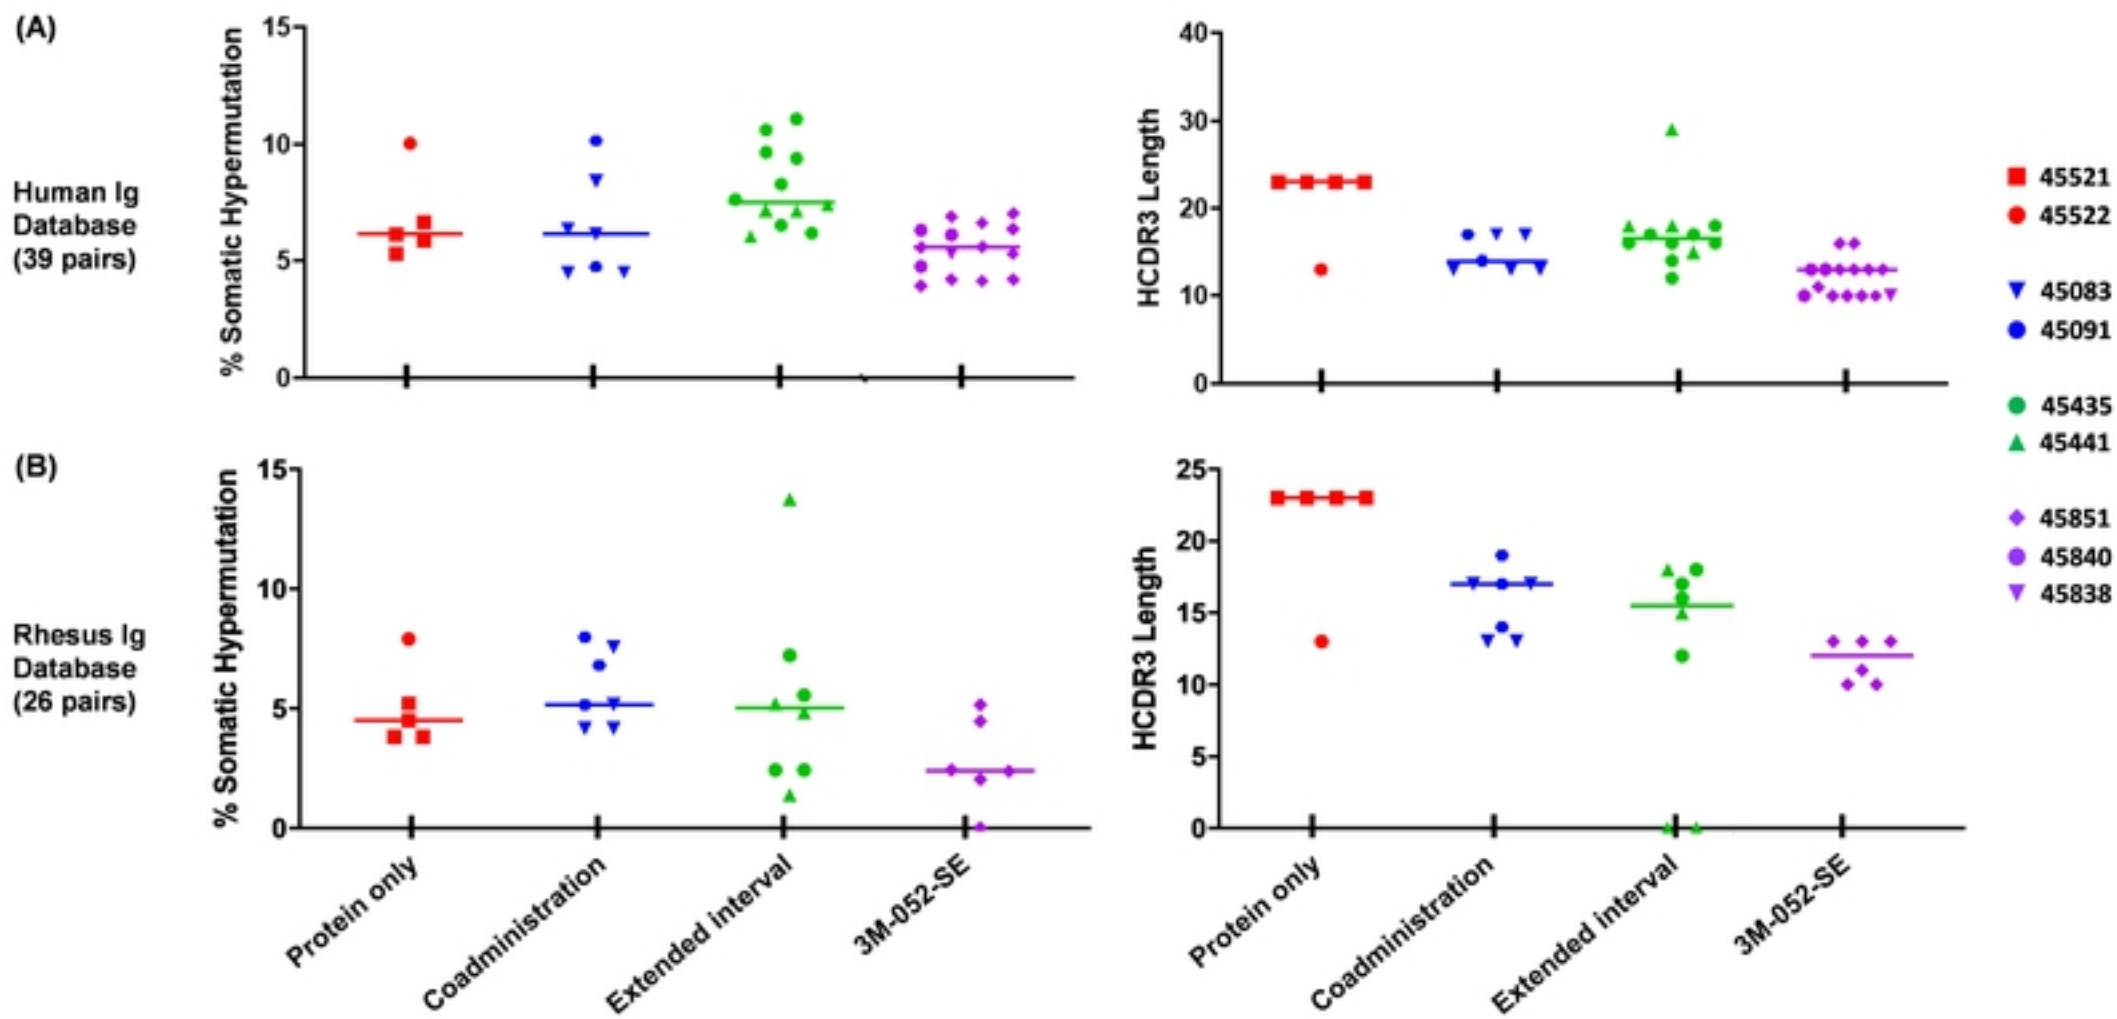

Figure 3
